# Supplementary material for: Enhanced bone regeneration via PHA scaffolds coated with polydopamine-captured BMP2
Source: Royal Society of Chemistry journal article supplement (doi:10.1039/d2tb01122k), 2022-01-01
Supplement: d2tb01122k1.pdf [file d2tb01122k1.pdf]

## Supporting Information

### Title

Enhanced Bone Regeneration via PHA Scaffolds Coated with Polydopamine-Captured BMP2

### Authors:

*Xu Zhang<sup>#</sup>, Jian Li<sup>#</sup>, Jin Chen, Zi-Xin Peng, Jiang-Nan Chen, Xinyi Liu, Fuqing Wu, Peng Zhang\*, and Guo-Qiang Chen\**

### Affiliations:

Dr. X. Zhang, Prof. G. Q. Chen ([Corresponding authors](#))  
Key Laboratory of Industrial Biocatalysis, Ministry of Education  
Department of Chemical Engineering  
Tsinghua University  
Tsinghua-Peking Center of Life Sciences  
Beijing 100084, China  
E-mail: [chengq@mail.tsinghua.edu.cn](mailto:chengq@mail.tsinghua.edu.cn)

J. Li, Z. X. Peng, Prof. P. Zhang ([Corresponding authors](#))  
Shenzhen Engineering Research Center for Medical Bioactive Materials  
Center for Translational Medicine Research & Development  
Shenzhen Institutes of Advanced Technology  
Chinese Academy of Sciences  
Shenzhen, Guangdong, 518055, China.  
E-mail: [peng.zhang@siat.ac.cn](mailto:peng.zhang@siat.ac.cn)

J. Chen, J.-N. Chen, X. Liu, Dr. F. Wu, Prof. G. Q. Chen  
School of Life Sciences  
Tsinghua University  
Tsinghua-Peking Center of Life Sciences  
Beijing 100084, China

**# X. Z. and J. L. contributed equally to this paper**

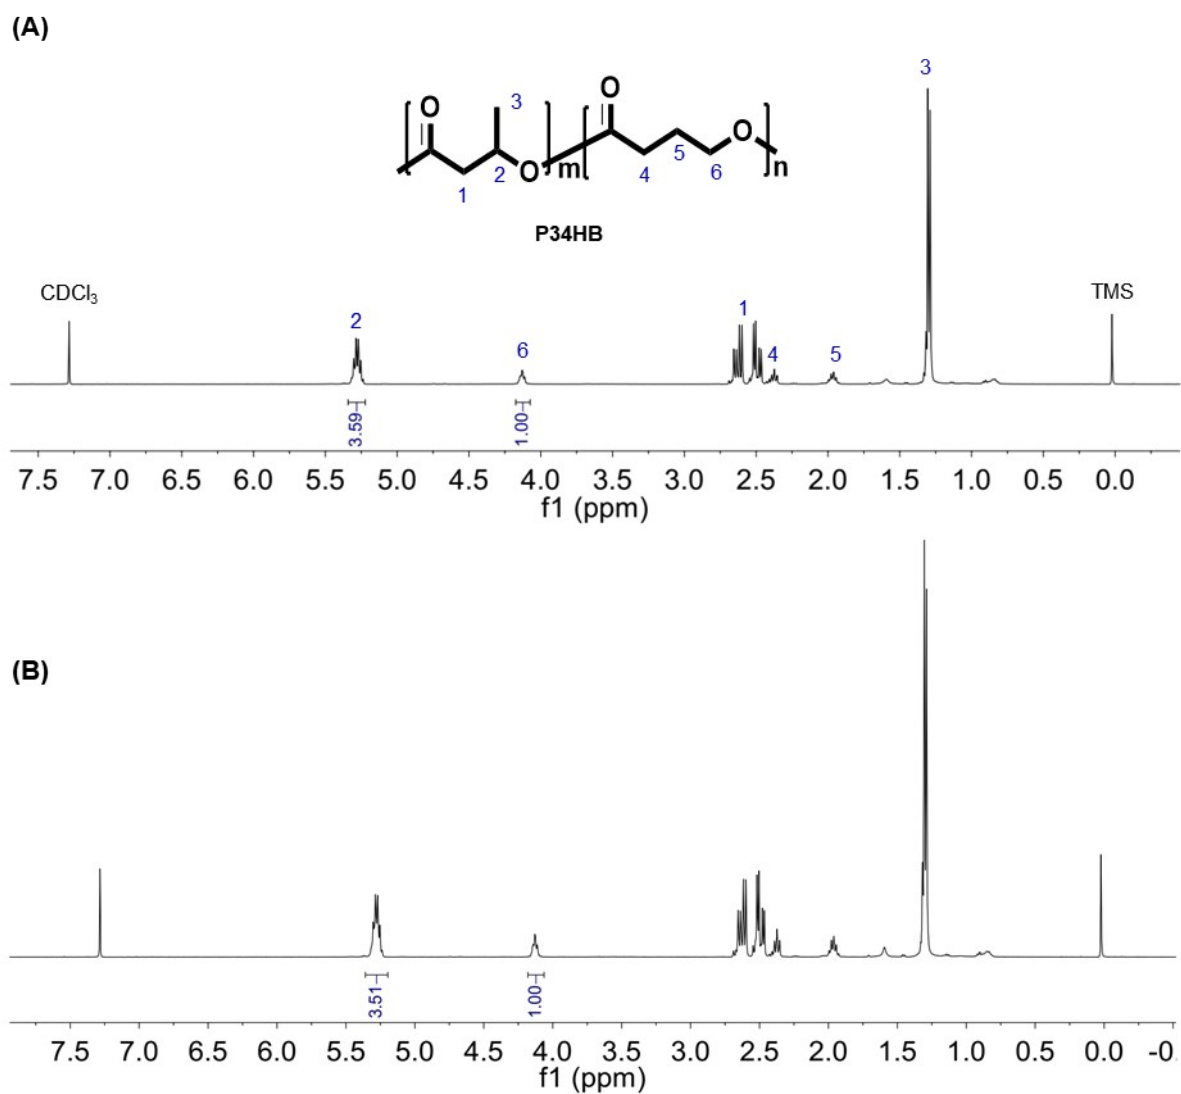

**Figure S1.** Structural analysis of PHA materials using <sup>1</sup>H Nuclear magnetic resonance (NMR).

(A) P34HB raw materials were biosynthesized using engineered *H. bluephagenesis* TD; (B)

P34HB materials were obtained after FDM.

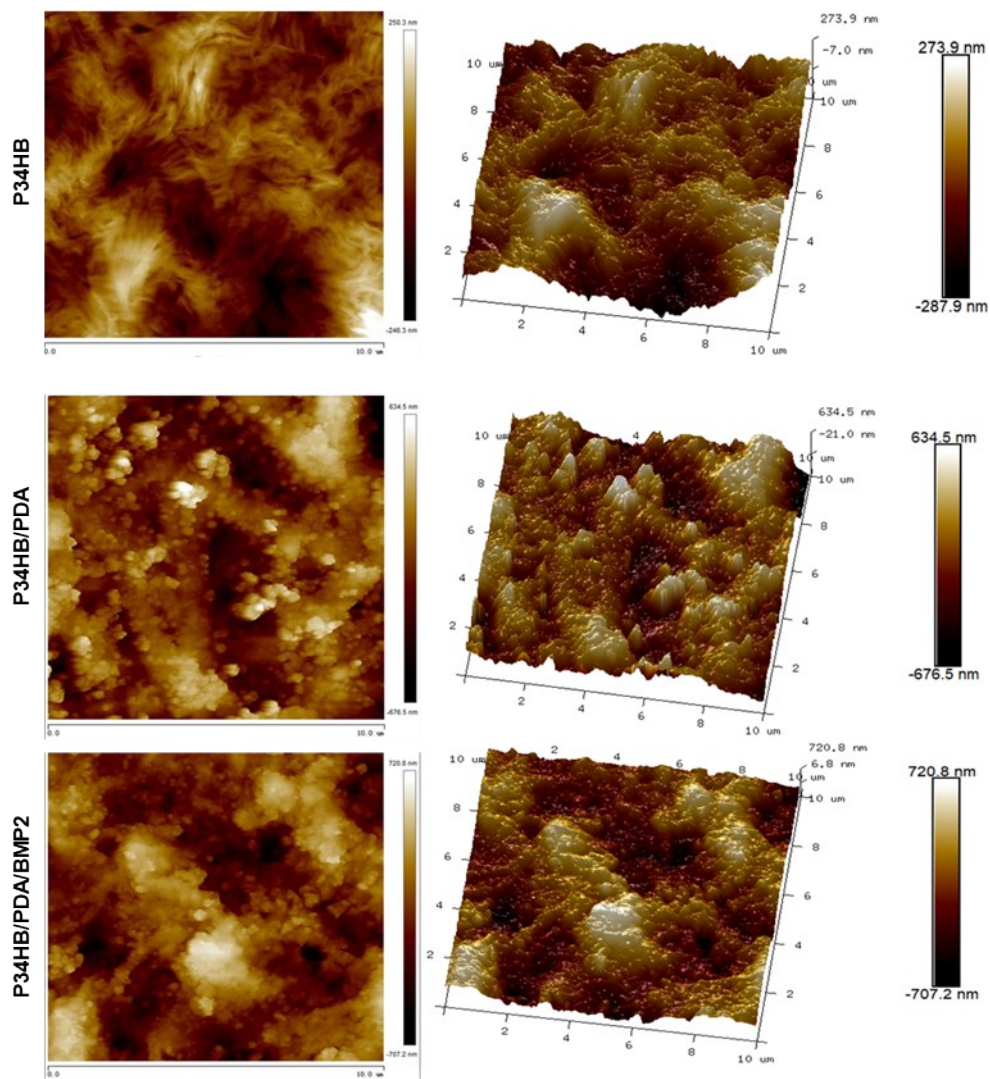

**Figure S2.** Surface morphology of different P34HB films determined by atom force microscope (AFM).

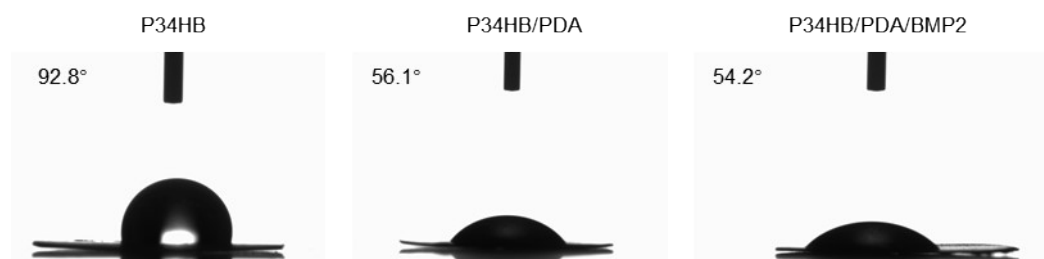

**Figure S3.** The hydrophilicity of P34HB films including P34HB, PDA-coated P34HB and BMP2-functionalized P34HB, as determined by a video optical contact angle measuring instrument.

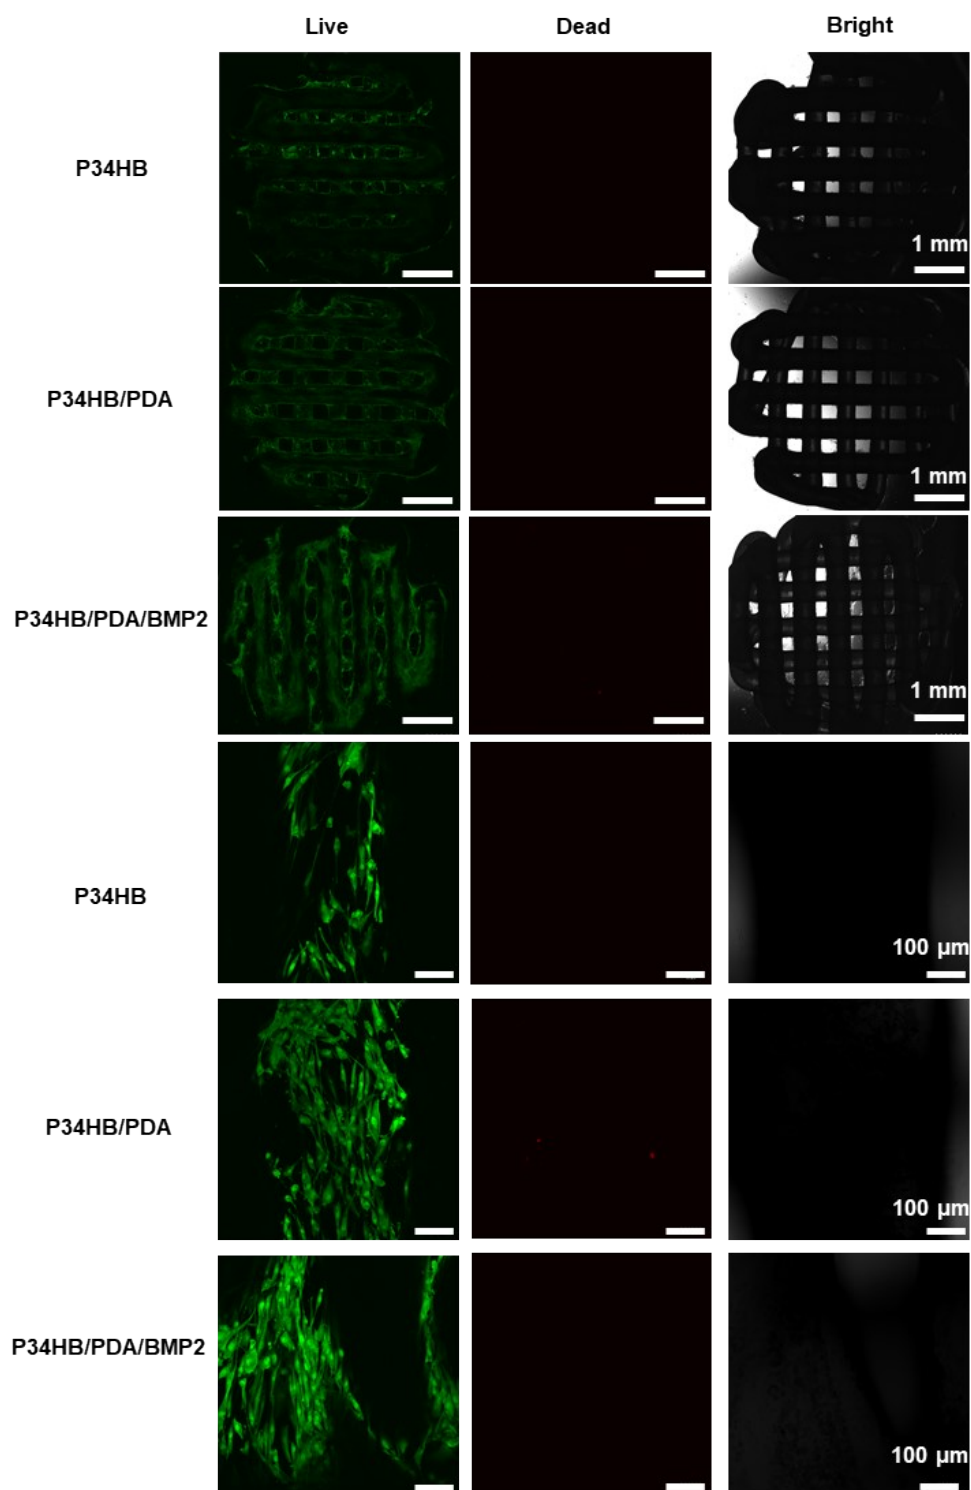

**Figure S4.** Representative confocal fluorescence images of ADSCs cocultured with scaffolds for day 7 and stained with LIVE/DEAD assay kit (live cells, green fluorescence; dead cells, red fluorescence).

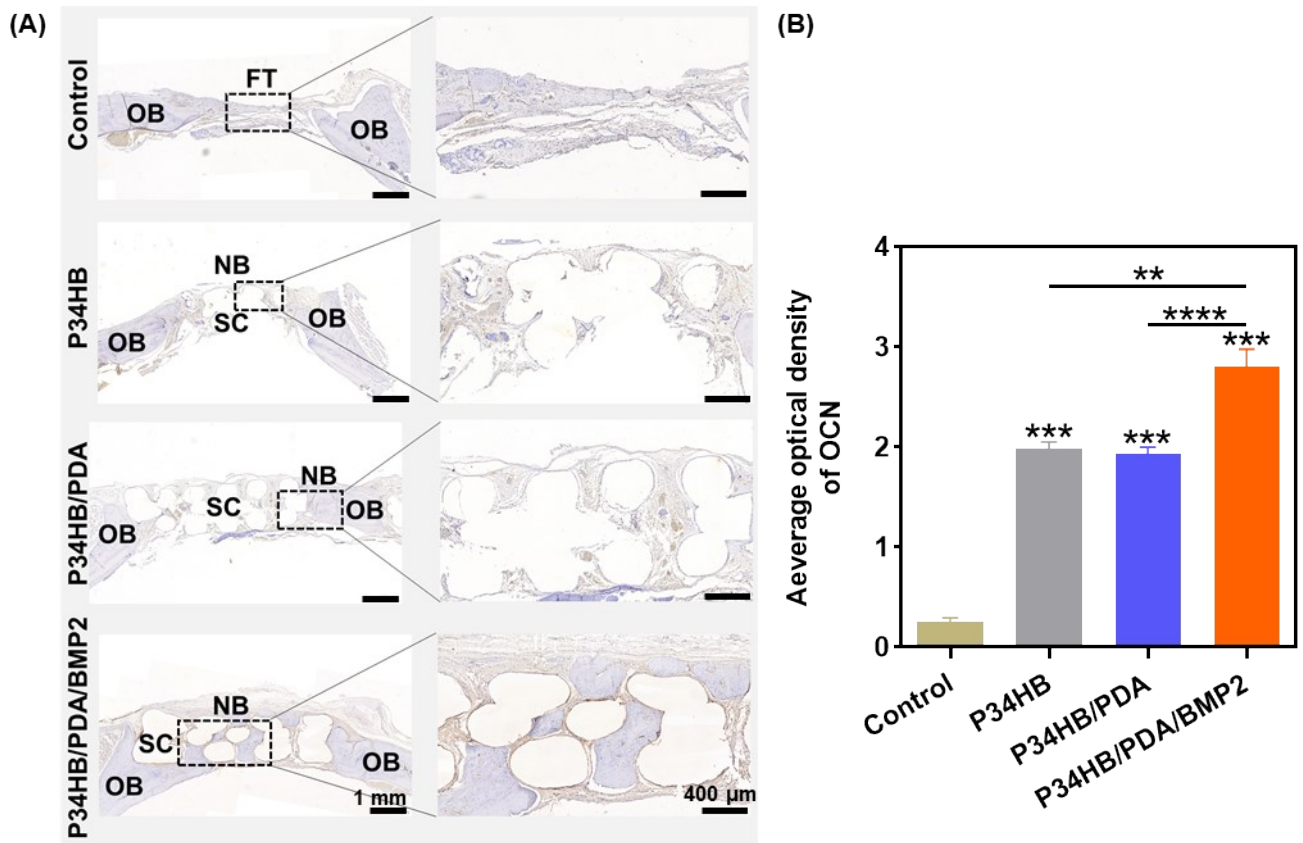

**Figure S5.** Histological staining and observation of bone tissue decalcified sections after 8 weeks of post-implantation. (A) Immunohistochemical staining of OCN; (B) Quantified average optical density at region of interest (ROI); OB, original bone; FT, fibrous tissue; NB, new bone; SC, scaffolds. The control group in the figure represented that there were no scaffolds. All data were showed as means  $\pm$  SD. \*\* $P < 0.01$ , \*\*\* $P < 0.001$ , \*\*\*\* $P < 0.0001$ , one-way analysis of variance (ANOVA) with Tukey's post hoc test.

**Table S1.** Primer sequences of gene-related osteogenesis in RT-PCR.

| Gene          | forward                    | reverse                     |
|---------------|----------------------------|-----------------------------|
| <i>RUNX2</i>  | 5'-CACTGGCGCTGCAACAAGA-3'  | 5'-CATTCCGGAGCTCAGCAGAAT-3' |
| <i>Colla1</i> | 5'-GCTTGGTCCACTTGCTTGA-3'  | 5'-GAGCATTGCCTTTGATTGCTG-3' |
| <i>OCN</i>    | 5'-TGTGGAGGGTTGTGGGTGT-3'  | 5'-TCAACTGGGGTGGGGTTTT-3'   |
| <i>OPN</i>    | 5'-GATGAATCTGATGAACTGGT-3' | 5'-GTGATGTCCTCGTCTGTAGCA-3' |
| <i>GAPDH</i>  | 5'-GCACCGTCAAGGCTGAGAAC-3' | 5'-TGGTGAAGACGCCAGTGGA-3'   |
